# Supplementary material for: Manufacturing of polytetrafluoroethylene fine fibers by waterjet impacting
Source: Royal Society of Chemistry journal article supplement (doi:10.1039/d1ra05074e), 2021-01-01

## Manufacturing of polytetrafluoroethylene fine fibers by waterjet impacting

Yukang Xu, <sup>a,\*</sup> Lei wang, <sup>b</sup> Guangliang Tian, <sup>c</sup> Yuanyuan Li, <sup>a</sup> Ping Wang, <sup>a</sup> Zhijuan Pan <sup>a</sup> and Xiangyu Jin <sup>c</sup>

<sup>a</sup> College of Textile and Clothing Engineering, Soochow University, Jiangsu, 215021, China; [xuyukang@suda.edu.cn](mailto:xuyukang@suda.edu.cn).

<sup>b</sup> Department of anesthesiology, the Affiliated Huai'an Hospital of Xuzhou Medical University, Jiangsu, 223003, China.

<sup>c</sup> Engineering Research Center of Technical Textiles, Ministry of Education, Donghua University, Shanghai 201620, China.

\* Correspondence: [xuyukang@suda.edu.cn](mailto:xuyukang@suda.edu.cn)

## Captions

Fig.S1 Diameter distributions of MW46 PTFE fibers impacted by waterjets at different pressures and jets.

Fig.S2 Diameter distributions of MW47 PTFE fibers impacted by waterjets at different pressures and jets.

Fig.S3 Diameter distributions of MW48 PTFE fibers impacted by waterjets at different pressures and jets.

Fig.S4 Diameter distributions of MW49 PTFE fibers impacted by waterjets at different pressures and jets.

Fig.S1

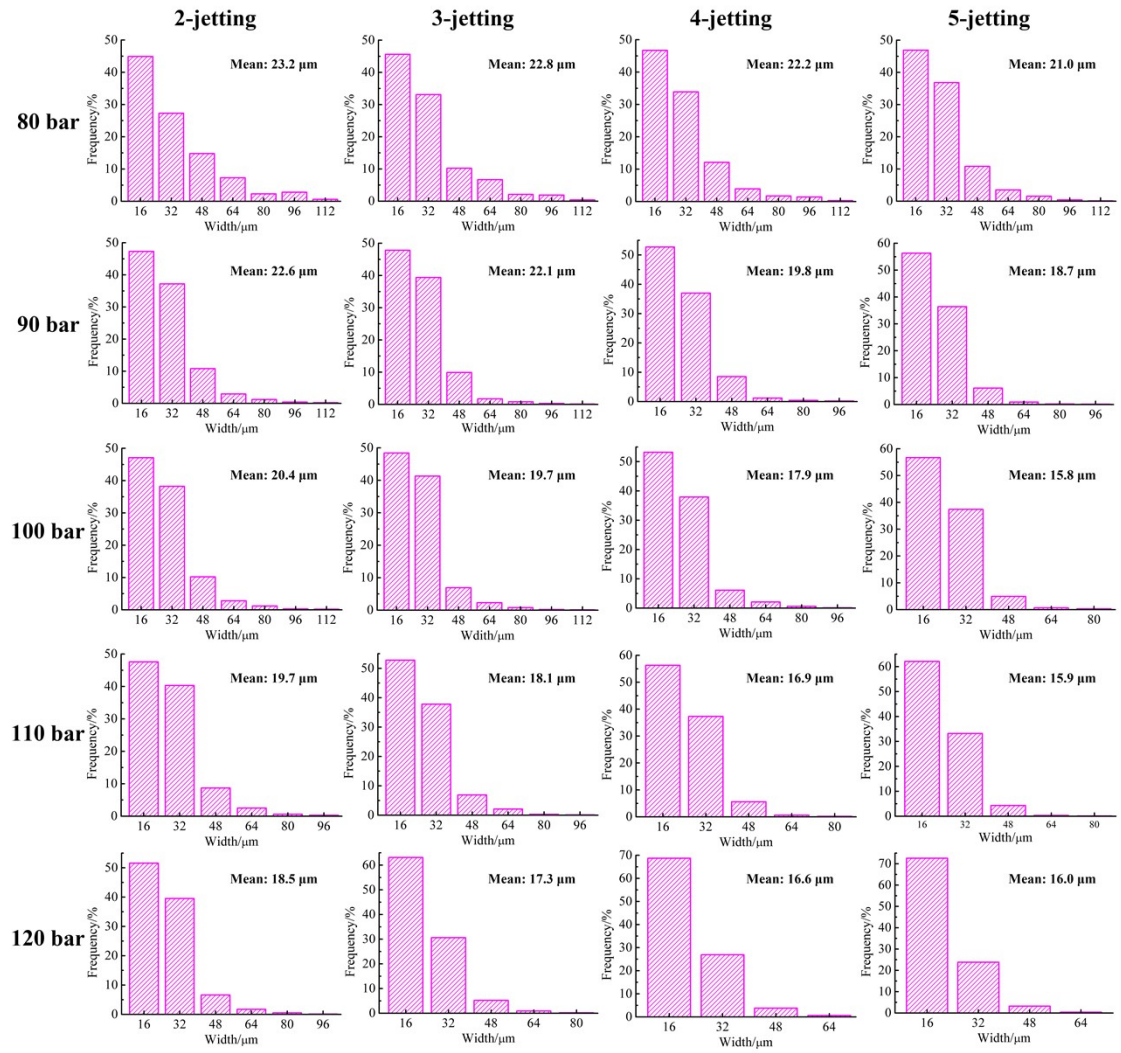

Fig.S2

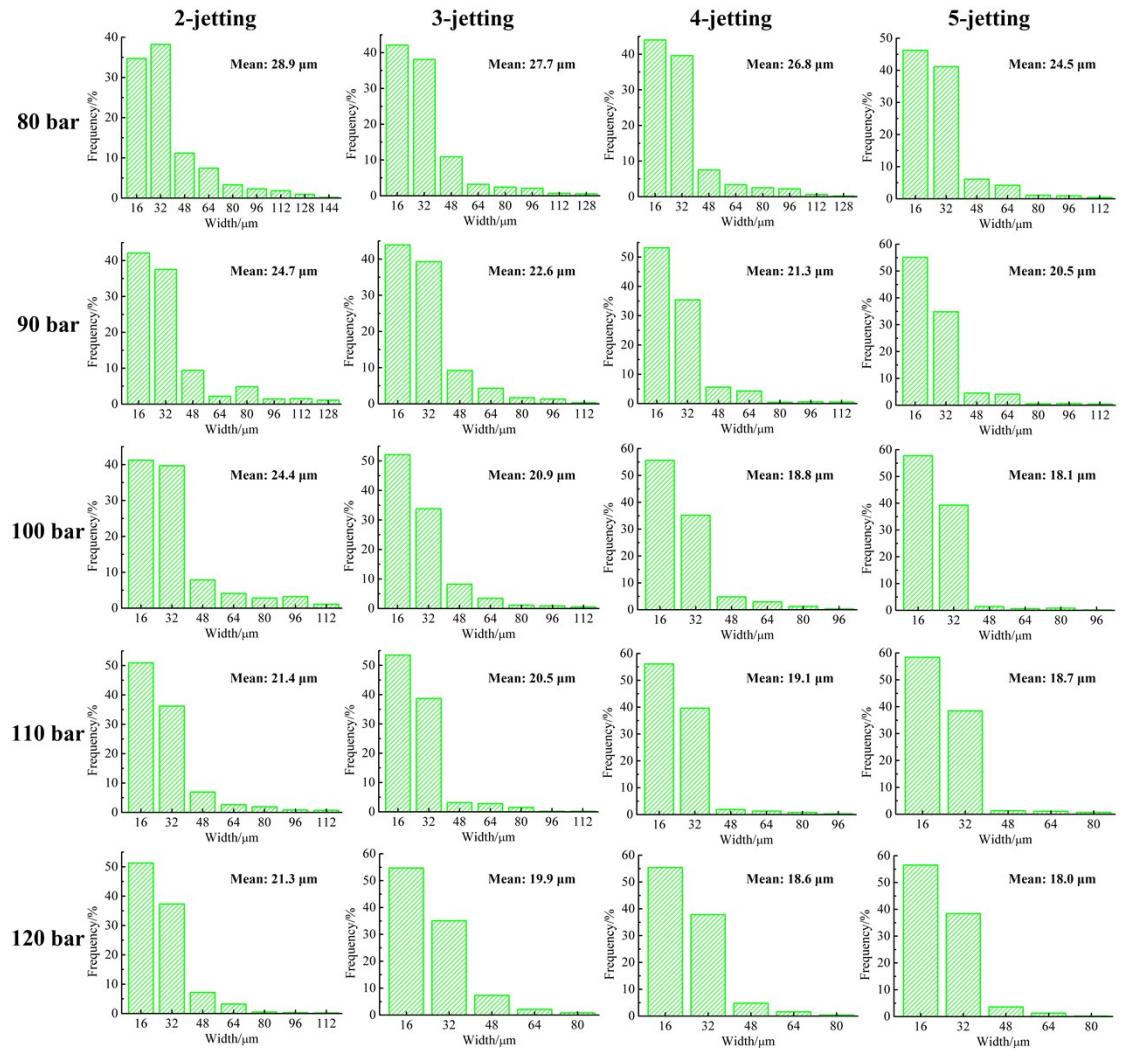

Fig.S3

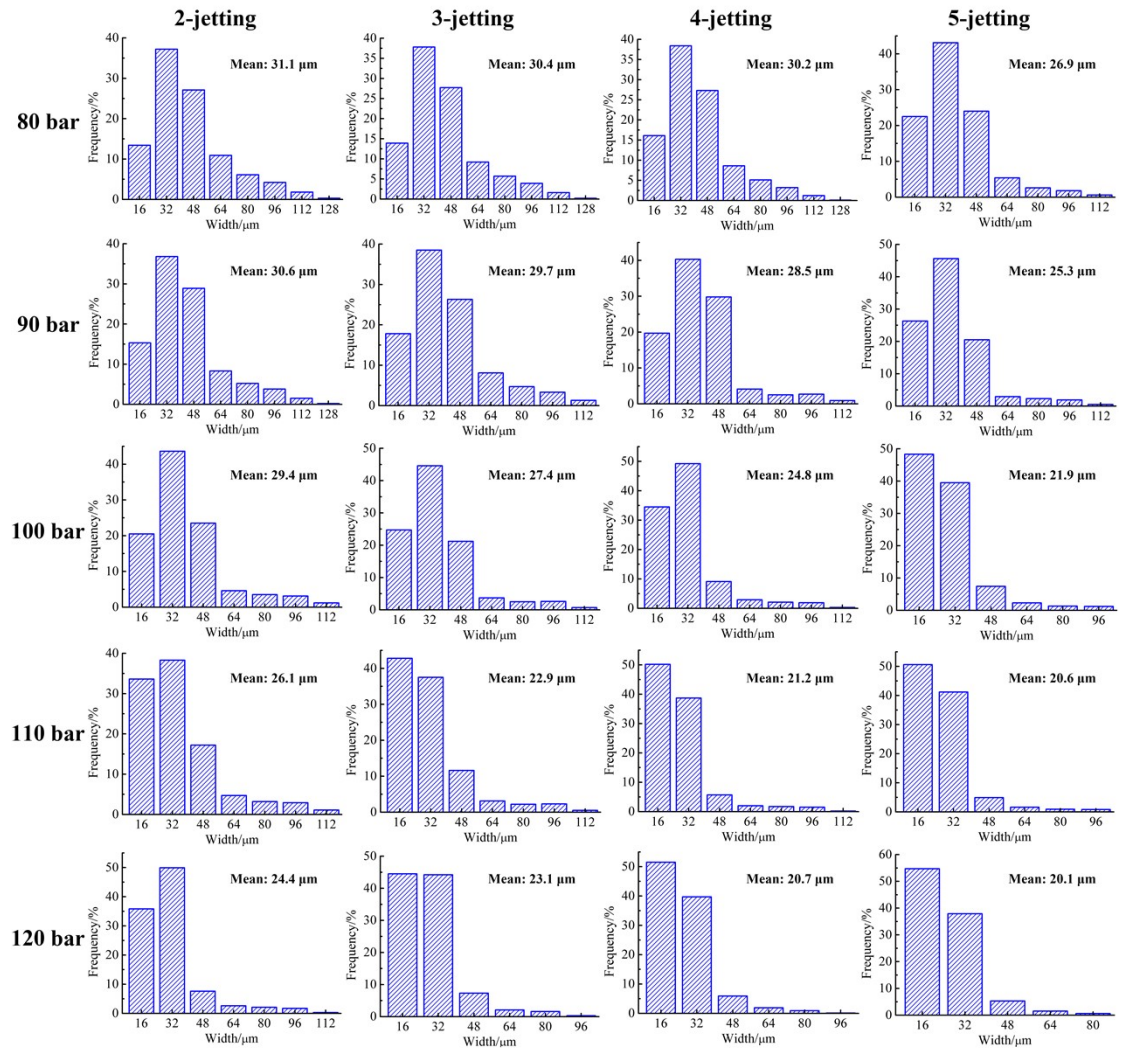

Fig.S4

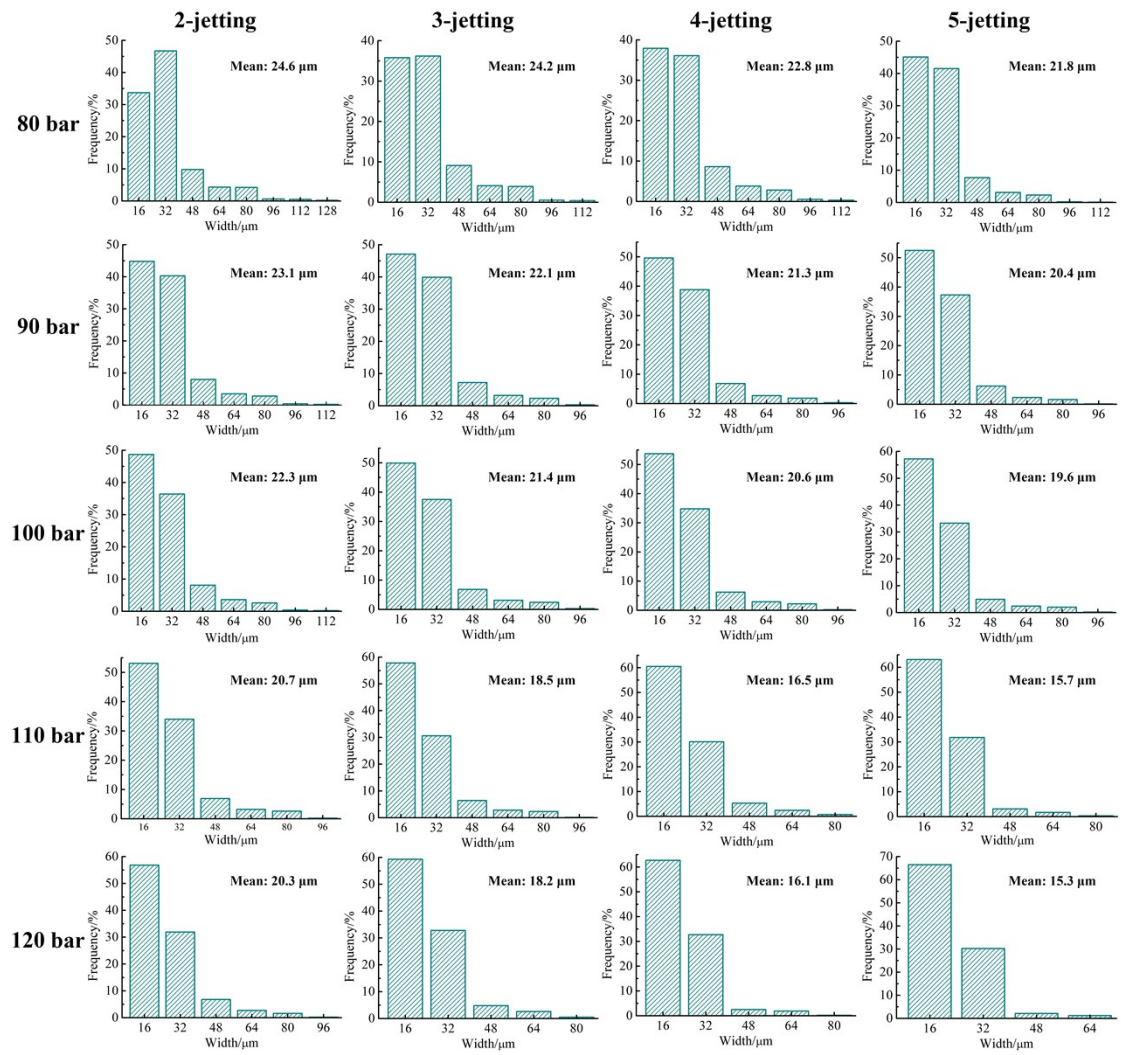

Supplement: d1ra05074e1.pdf [file d1ra05074e1.pdf]
